# Supplementary material
Source: Springer Nature journal article supplement (https://www.springermedizin.de/resource/supplementary/12913_2006_382_MOESM2_ESM.pdf/9535064)
Supplement: MOESM2 [file 9535064]

Table 2. Health care utilization in 12 months

|                     | General practitioners | Specialists | Hospital overnight stay |
|---------------------|-----------------------|-------------|-------------------------|
| Mean visit (median) | 3.37 (2)              | 0.84 (0)    | 0.59 (0)                |
| % no use            | 20.75                 | 70.31       | 91.33                   |
| % at least 1 use    | 79.25                 | 29.69       | 8.67                    |

All figures are weighted
